## Risk of SARS-CoV-2 infection from contaminated water systems

Jamie Shutler<sup>1\*</sup>, Krzysztof Zaraska<sup>2</sup>, Tom Holding<sup>1</sup>, Monika Machnik<sup>2</sup>, Kiranmai Uppuluri<sup>2</sup>,  
Ian Ashton<sup>1</sup>, Łukasz Migdał<sup>3</sup>, Ravinder Dahiya<sup>4</sup>

<sup>1</sup> University of Exeter, Penryn campus, Cornwall, UK.

<sup>2</sup> Łukasiewicz - Institute of Electron Technology, Poland.

<sup>3</sup> University of Agriculture in Krakow, Poland.

<sup>4</sup> Bendable Electronics and Sensing Technologies (BEST) Group, University of Glasgow, Glasgow, UK.

\* Corresponding author email address [j.d.shutler@exeter.ac.uk](mailto:j.d.shutler@exeter.ac.uk)

### Abstract

Following the outbreak of severe acute respiratory syndrome coronavirus (SARS-CoV-2) in China, airborne water droplets (aerosols) have been identified as the main transmission route, although other transmission routes are likely to exist. We quantify SARS-CoV-2 virus survivability within water and the risk of infection posed by faecal contaminated water within 39 countries. We identify that the virus can remain stable within water for up to 25 days, and country specific relative risk of infection posed by faecal contaminated water is related to the environment. Faecal contaminated rivers, waterways and water systems within countries with high infection rates can provide infectious doses >100 copies within 100 ml of water. The implications for freshwater systems, the coastal marine environment and virus resurgence are discussed.

## 27 **Introduction**

28 The outbreak of the severe acute respiratory syndrome coronavirus (SARS-CoV-2) began  
29 in Wuhan province, China in December 2019 and has now spread throughout the world  
30 with about 6 million cases confirmed globally within 214 countries and territories. Water  
31 aerosols originating from individuals infected by SARS-CoV-2 are considered a major  
32 pathway for infection <sup>1</sup>, and the virus has been shown to remain stable in saline solution <sup>2</sup>  
33 and under varying environmental conditions <sup>3</sup>. Viral shedding in faeces of viable SARS-  
34 CoV-2 virus is documented (eg <sup>4</sup>) and SARS-CoV-2 ribonucleic acid (RNA) has been  
35 detected in the shed faeces of both symptomatic and asymptomatic children and adults  
36 (eg <sup>5</sup>); with potentially 43% of infections being asymptomatic and unreported <sup>6</sup>.

37  
38 Human viral pathogens that can be transmitted by water that pose moderate to high health  
39 significance as defined by the WHO include adenovirus, astrovirus, hepatitis A and E,  
40 rotavirus, norovirus and other enteroviruses. The survival of the large family of  
41 coronavirus in water systems has been highlighted <sup>7</sup>, and viral loads within untreated  
42 wastewater, consistent with population infection rates, have been identified <sup>8</sup>. While  
43 evidence for SARS CoV-2 is limited, other human coronaviruses are documented to  
44 survive in wastewater effluent <sup>9</sup>, with colder water temperature likely to increase survival  
45 considerably <sup>3</sup>. Collectively this evidence suggests that SARS-CoV-2 virus can survive  
46 within water and the viral loads within untreated sewage effluent are likely high in countries  
47 of high infection rates, a portion of which is viable virus, and therefore water contaminated  
48 with sewage provides a potential faecal-oral transmission route (eg <sup>10</sup>).

49  
50 Sewage can directly enter natural water systems due to combined sewer overflow events  
51 and sewage exfiltration from pipes (eg <sup>11</sup>) unexpected failure of water treatment systems or  
52 a complete lack of water treatment infrastructure, providing a pathway for onward

53 transmission. For example, during the current pandemic large sewage spills, flooding  
54 dwellings and community spaces, have occurred in America (within Georgia, Florida and  
55 New York) and Spain (Andalucia), while temporary settlements (eg shanty towns, favelas  
56 or bustees) and refugee camps are less likely to have safe sanitation systems. Within  
57 these settings, this water system pathway could enable viral infection to humans or other  
58 susceptible animals via water ingestion or through filtering of water during feeding.

59

60 The highly skewed distribution of infected patient viral loads observed <sup>12</sup> contain the effects  
61 of super spreaders, where single individuals can be responsible for the majority of the viral  
62 loading. This viral distribution means that sewage originating from populations that contain  
63 super spreaders will contain very high viral loads, even though the majority of the  
64 population contribute relatively low viral loadings.

65

66 Considering the above, we identify the survivability of SARS-CoV-2 within water systems  
67 using published in vitro study data <sup>3</sup>. We then used an established 'down the drain'  
68 pollution analysis to calculate the dilution in rivers <sup>13</sup>, combined with our empirical virus  
69 survivability model, to calculate of the relative risk posed to humans by sewage spills  
70 within 39 countries. Results using infection numbers on May 03 2020 for 21 countries,  
71 where inland water temperatures were available, identify viable waterborne virus  
72 concentrations that, if faecal contamination had occurred, would result in a high probability  
73 of infection. The implications of these findings for waterborne virus transmission to humans  
74 and animals are discussed and recommendations for reducing risk of infection are given.

75

## 76 **Results**

77 Exponential temperature driven survivability identifies that the virus can remain stable and  
78 above detection limits for up to 25 days (figure 1a). The relative risk, the normalized

79 country comparable risk associated with a sewage spill after dilution within rivers (figure  
80 1b, 1c) is dependent upon domestic water usage and riverine dilution, where dilution is  
81 dependent upon geographical location, relief and weather. Countries with lowest relative  
82 risk are those with both high domestic water usage and high dilution (eg Canada, Norway  
83 and Venezuela). Highest relative risk results from a combination of low to medium  
84 domestic water usage and low dilution (eg Morocco, Spain, Germany). Translating these  
85 results to the proportion of the population infected within 21 countries on May 03 2020  
86 identifies the estimated upper and lower limit of viable waterborne virus concentration  
87 within the first 24 hours, assuming that a spill occurred (figure 2; uncertainty on the viable  
88 virus concentration is  $\pm 68\%$  copies  $L^{-1}$ ). Absolute concentrations are higher and will exist  
89 for longer within countries with a combination of higher relative risk, colder water and high  
90 population infection rates. Assuming infection requires a dose of 100 copies, then a person  
91 within the 3 countries with the highest concentrations (Spain, UK, Morocco) who within 24  
92 hours of a spill ingests 100 ml of the contaminated water could receive a total dose  $>468$   
93 copies resulting in a high probability of infection (table 1; full dosage range across all  
94 cases is 46 to 3080 copies). 100 ml is the equivalent of 1 to 2 mouthfuls and swimmers  
95 can swallow up to 280 ml in a 45 minute swim<sup>14</sup>. The combination of figure 1a and figure  
96 2a can be used to understand the viable virus concentration after the first 24 hours. The  
97 water temperature-controlled virus survivability means that concentrations reduce quickly  
98 in Morocco within 24 hours of a spill, whereas the concentrations remain for longer in  
99 Spain and the UK where water temperatures are lower (table 1; Figure 2a).

100

101

102

103

104

105 **Table 1** Viable virus concentration results for the 3 countries for the 3 May 2020 assuming  
106 a spill occurred. Median dilution (DF) along with middle<sup>\*</sup> and high<sup>§</sup> viable to unviable viral  
107 ratio (I) results are given to provide a reasonable range of the concentrations within the  
108 first 24 hours. <sup>&</sup>Low DF and high I results enable the extreme range of concentrations to  
109 be estimated. Viral survival rates after 24 and 48 hours show how the viable viral  
110 concentrations reduce due to temperature driven die off.

| Country | Code | * I=1%,<br>median DF,<br>copies L <sup>-1</sup> | § I=10%,<br>median DF,<br>copies L <sup>-1</sup> | & I=10%,<br>low DF,<br>copies L <sup>-1</sup> | 100 ml dose for<br>case <sup>§</sup> and total<br>range, copies | 24 hour<br>survival<br>, % | 48 hour<br>survival<br>, % |
|---------|------|-------------------------------------------------|--------------------------------------------------|-----------------------------------------------|-----------------------------------------------------------------|----------------------------|----------------------------|
| Spain   | SPA  | 632                                             | 6325                                             | 6325                                          | 633 (63* to 633 <sup>&amp;</sup> )                              | 67                         | 45                         |
| UK      | GBR  | 468                                             | 4682                                             | 30792                                         | 468 (47* to 3080 <sup>&amp;</sup> )                             | 72                         | 52                         |
| Morocco | MAR  | 459                                             | 4595                                             | 25255                                         | 459 (46* to 2526 <sup>&amp;</sup> )                             | 38                         | 15                         |

111

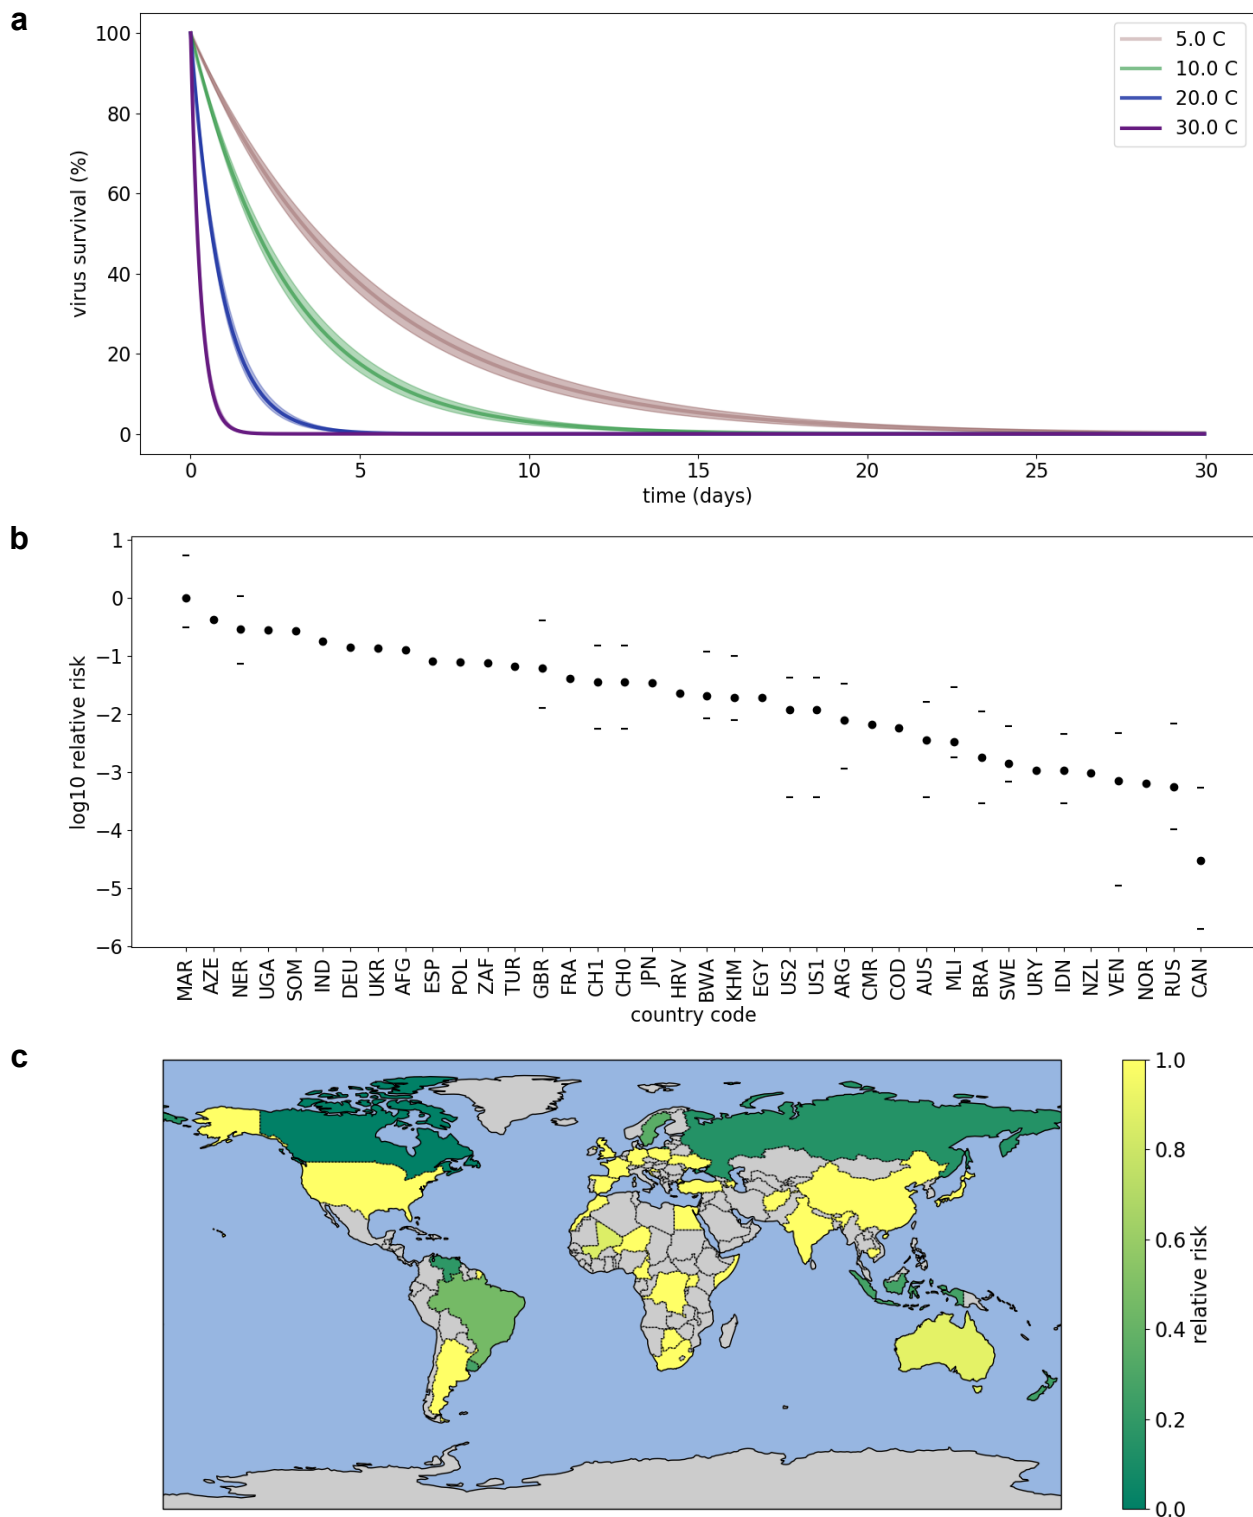

**Figure 1** Virus survivability within water and relative risk posed by sewage spills into rivers for 39 countries; a) modelled temperature survivability. Shaded areas show the temperature dependent uncertainties; b) log<sub>10</sub> relative risk covering the range of 0.001 to 1.0; circles are median values, horizontal lines are 25<sup>th</sup> and 75<sup>th</sup> percentiles due to dilution factors from <sup>13</sup> and c) countries where relative risk has been calculated with relative risk as a linear scale; grey signifies a country not included.

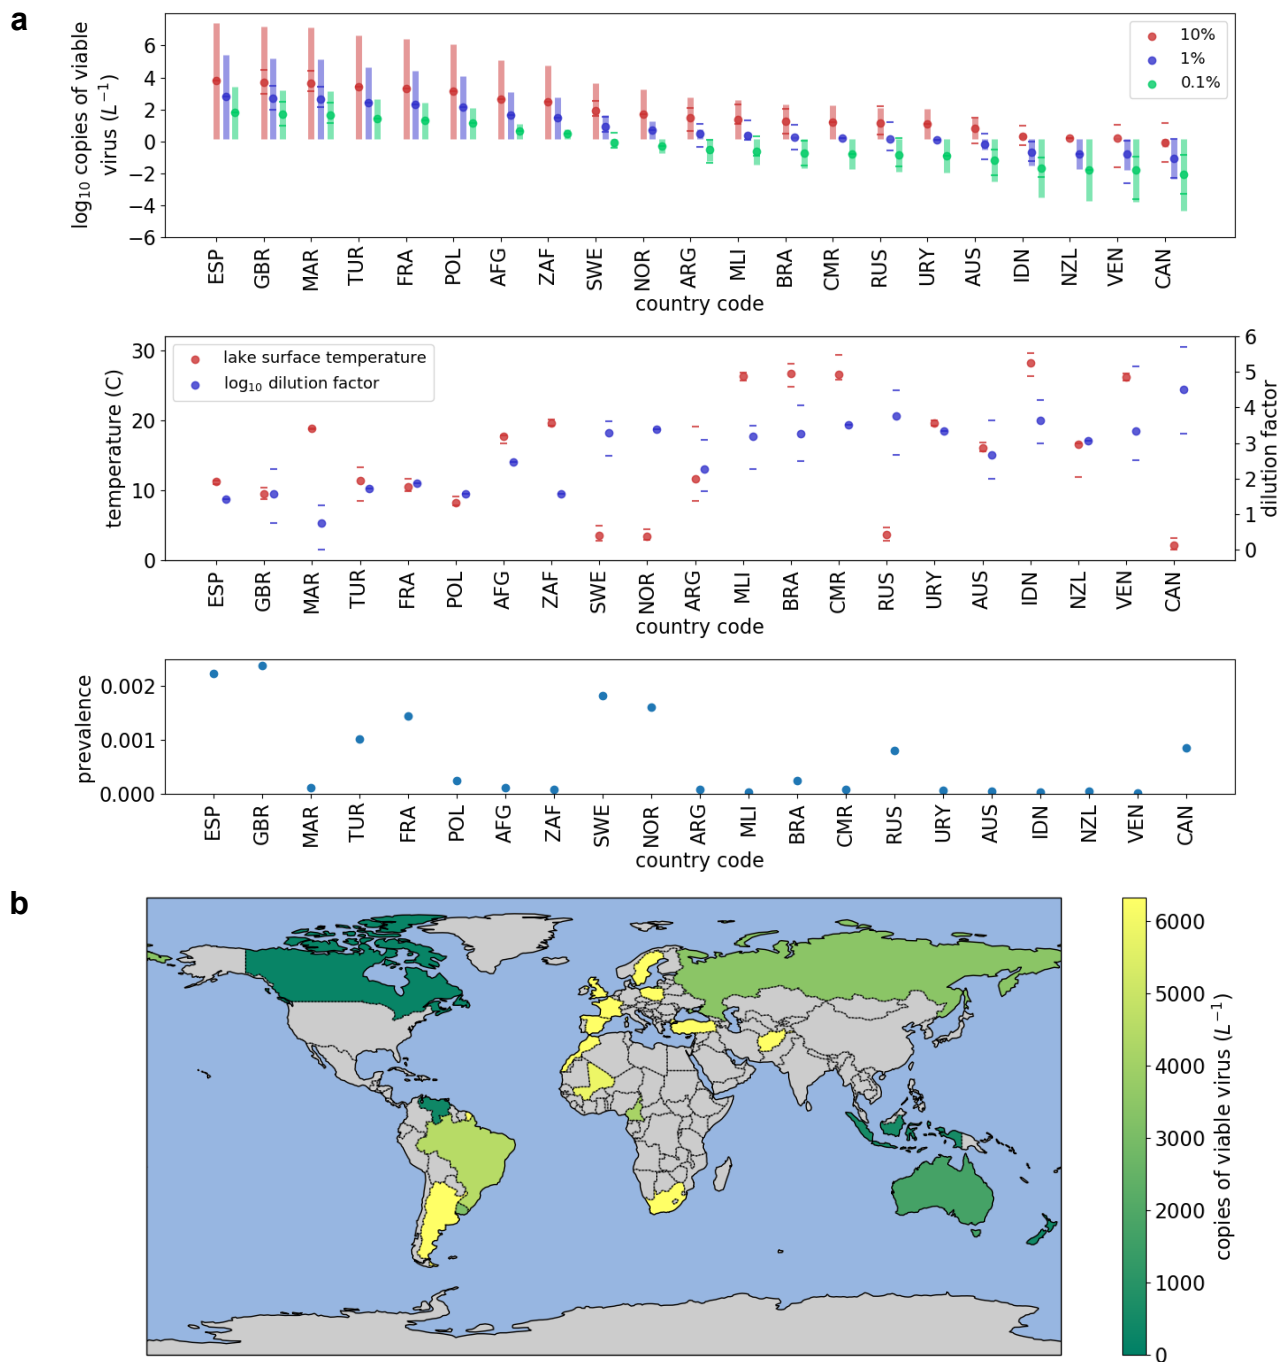

**Figure 2** Estimate of absolute viable viral concentration within inland waters on the May 03 2020 for 21 countries assuming a sewage spill has occurred. a) absolute viable viral concentrations in  $\log_{10}$  copies. Circles are median, horizontal lines are 25<sup>th</sup> and 75<sup>th</sup> percentiles due to dilution factors from <sup>13</sup>; shaded uncertainty bars are  $\pm 68\%$  copies  $L^{-1}$ . Results are shown for three possible ratios of viable virus to viral genome copies (10%, 1% and 0.1%) and b) countries where viable viral loads have been calculated. Grey signifies a country not included; viral concentrations are presented as a linear scale in copies of viable virus.

## 114 **Discussion**

115 The detection of SARS-CoV-2 virus in the aquatic environment <sup>15</sup> does not necessarily  
116 translate into the presence of viable virus. To estimate the number of viable (infectious)  
117 virus copies, the proportion of infectious viruses in sewage must be known. The presence  
118 of infectious virus in stool samples has been demonstrated <sup>4</sup>, but there is a lack of  
119 quantitative data on this ratio for SARS-CoV-2 in stool. We instead used literature on the  
120 number of infectious adenovirus copies in sewage (eg <sup>16</sup>) and wastewater discharge into  
121 rivers <sup>17</sup> to select high ( $10^{-1}$ ) medium ( $10^{-2}$ ) and low ( $10^{-3}$ ) estimates for the ratio of  
122 infectious virus to genome copies to infectious viruses. We note that adenoviruses are  
123 known to be particularly resilient, and therefore likely to represent an upper estimate, but  
124 also that our selected range is consistent with the  $10^{-3}$  value used elsewhere for assessing  
125 viral risk in water systems (eg <sup>14</sup>), including one assessment for SARS CoV-2 transmission  
126 risk to wastewater workers <sup>18</sup>.

127

128 The temperature dependent survivability means that it is likely that the risk posed by  
129 wastewater will increase during winter months as the sewage temperature will be lower  
130 enabling longer viral survival, but temperature history and age of the sewage will be  
131 needed to fully understand any detected viral loads. SARS-CoV-2 infection to, and spread  
132 between, domestic cats has occurred due to similarities between human and some animal  
133 angiotensin converting enzyme 2 (ACE2) gene <sup>20</sup>. Increased animal foraging can occur  
134 downstream from water treatment facilities, relative to upstream, highlighting possible risk  
135 of some riparian wildlife infection if feeding occurs after a spill.

136

## 137 **Implications for drinking water**

138 It is possible that SARS-CoV-2 survivability and transport within rivers could impact  
139 drinking water supplies in countries where rivers or reservoirs are the primary drinking



140 water sources and where large populations, with little or no sewage treatment, exist close  
141 to the water source, such as within refugee camps or shanty towns. Riverine enteric virus  
142 transport and catchment accumulation can occur for common viruses (eg <sup>21</sup>) and under  
143 stratified conditions it would be possible for a river plume to enter a reservoir and  
144 subsequently exit through the reservoir outlet without mixing with the main body of water.  
145 Filtering of water, followed by ultraviolet disinfection or chlorination are the recommended  
146 approaches for virus removal from drinking water sources <sup>22</sup>. Filtering is normally used to  
147 remove large particulates. The effective ultraviolet dose for SARS-CoV-2 disinfection  
148 appears highly variable and dependent upon the surface to which the virus is attached <sup>23</sup>.  
149 The upper dosage value of 1 Joule (J) cm<sup>-2</sup> to ensure effective ultraviolet disinfection of  
150 SARS-CoV-2 <sup>23</sup> is an order of magnitude larger than that typically used (~40 to 90 mJ cm<sup>-2</sup>)  
151 for low volume domestic drinking water treatment. The World Health Organization  
152 (WHO) guidelines state that effective chlorination disinfection occurs at residual chlorine  
153 concentrations of  $\geq 0.5 \text{ mg L}^{-1}$  <sup>22</sup>, which matches the minimum needed to deactivate  
154 SARS-CoV-1 <sup>24</sup>. However, the actual chlorine dosage used for water treatment can vary,  
155 based on country, region, water origin and infrastructure (eg UK guidelines are  
156 concentrations of 0.2 to 0.5 mg L<sup>-1</sup>). Collectively this means that if a drinking water source  
157 was to become infected with SARS-CoV-2 the standard virus removal and disinfection  
158 approaches of ultraviolet exposure and chlorination may not reduce the virus below  
159 detectable limits. Reviewing of regional or countrywide drinking water processing  
160 approaches is recommended to reduce the potential for SARS-CoV-2 surviving through  
161 drinking water processing systems. Boiling of drinking water will result in the virus being  
162 deactivated <sup>22</sup>. Refrigerated food that becomes contaminated (eg through washing or  
163 handling) could remain infectious for up to 25 days.

164

165

## 166 **Implications for the marine environment**

167 The virus remains stable over a range of pH<sup>3</sup> and in sterile saline solution at low  
168 temperatures<sup>2</sup>, so it is possible that there is no significant difference in virus temporal  
169 survival and infection risk between freshwater and seawater, and SARS-CoV-2 has  
170 already been identified within seawater, originating from untreated wastewater<sup>7</sup>.  
171 Bioaccumulation of the SARS-CoV-2 virus by molluscs and other aquatic organisms may  
172 occur as bivalves are known to accumulate waterborne viruses including hepatitis,  
173 norovirus and avian influenza<sup>25</sup>.

174  
175 Multiple cetaceans have very high ACE2 similarity to humans making them susceptible to  
176 SARS-CoV-2 infection including harbor porpoises, bottle nosed dolphins, minke whales,  
177 orca and pilot whales<sup>20</sup>. Of particular concern are whales whose throats are exposed to  
178 large volumes of water during feeding and who visit coastlines for prey that are known to  
179 accumulate around sewage outfalls, such as minke whales feeding on mackerel or orca  
180 feeding on chinook salmon. In these instances, the animal could be exposed to a large  
181 viral dose, even if the virus is only present within the water in low concentrations. For  
182 example, if the riverine viral concentration is low at 1 copie ml<sup>-1</sup>, which is undetectable by  
183 PCR (detection limit is >100 copies ml<sup>-1</sup>), then a medium sized whale filtering water during  
184 feeding could receive repeated doses of 5.65 million copies every second (see methods  
185 for calculation). A seafood market is among the suspected sources for the origin of the  
186 SARS-CoV-2 virus, so any viral transmission from land to sea may be a circular process.

187

## 188 **Conclusions**

189 Natural water systems are likely able to act as a transmission pathway for SARS-CoV-2  
190 which poses a threat to human infection. The analysis suggests that public interactions  
191 with rivers and coastal waters following wastewater spills should be minimized to reduce

192 the risk of infection. New volume integrating viral detection methods are needed to ensure  
193 the safety of water systems. While the primary risk associated with the current COVID-19  
194 outbreak appears to be human-to-human transmission of SARS-CoV-2, this work supports  
195 the plausibility that novel coronaviruses may also spill over to new wildlife hosts through  
196 infected faecal matter accidentally entering the natural aquatic environment; this potential  
197 virus reservoir could enable future resurgence in the human population.

198

### 199 **Supplementary**

200 Data files are provided for the viable viral counts (viral\_counts.xlsx) and relative risk data  
201 (relative\_risk.xlsx).

202

### 203 **Acknowledgements**

204 JDS, KZ and RD were partially supported by the European Union Marie Curie Innovative  
205 Training Network AquaSense (grant H2020-MSCA-ITN-2018-813680). RD was partially  
206 supported through Engineering and Physical Science Research Council (EPSRC)  
207 Engineering Fellowship for Growth (grant EP/R029644/1). JDS and TH were partially  
208 supported by the European Space Agency project OceanSODA (grant 4000125955/18/I-  
209 BG).

210

### 211 **Author contributions**

212 JDS, KZ, RD and TH developed the initial ideas. JDS, KZ, TH, MM, KU and LM developed  
213 the methods. IA provided computing facilities. All authors contributed to the writing of the  
214 manuscript.

## 215 **Methods**

### 216 **Risk from wastewater spillage between countries**

217 The relative risk of SARS CoV-2 from waste water systems is calculated by using a  
218 modified version of equations 1 and 2 from <sup>13</sup>, given as

$$219 \quad H_c = \frac{1}{V_{ww,c} DF_c} \quad (1)$$

220 where  $V_{ww,c}$  is the per capital daily volume of domestic water usage for country  $c$ , and  $DF_c$   
221 is the dilution factor downloaded from <sup>13</sup> supplemental table 1 and supplemental table 2,  
222 respectively. Normalising  $H_c$  across all country median DF values provides the between  
223 country relative risk of water borne infection due to the viral load in a river following a  
224 sewage effluent spill (shown in figures 1b and 1c).

225

226 The number of infectious virus copies in the water system as a result of a waste water spill  
227 or leak is calculated by multiplying  $H_c$  by the number of infectious viruses in faeces  
228 generated by the infectious proportion of a county's population,  $C_{inf,c}$ . This is calculated  
229 using

$$230 \quad C_{inf,c} = \frac{V_{faeces} C_{faeces} P_c}{I} \quad (2)$$

231 where  $V_{faeces}$  is the volume of faeces generated (litres, L, per capita per day),  $C_{faeces}$  is the  
232 number of viral RNA copies in faecal matter ( $L^{-1}$ ),  $P_c$  is the proportion of the population of  
233 country  $c$  that have active infections, and  $I$  is the ratio of viral RNA copies to viable  
234 (infectious) virus.

235 We note that measured wastewater viral counts in Paris on the 9<sup>th</sup> April were  $3.1 \times 10^6$   
236 genome copies  $L^{-1}$  with 82,000 active cases <sup>19</sup>, whereas using our (albeit country specific)  
237 method gives the estimate of  $1.3 \times 10^6$  genome copies  $L^{-1}$ , which is within the correct order  
238 of magnitude (this calculation used the same number of active cases).

239

240 To calculate  $C_{faeces}$  we assumed a log-normal distribution and calculated the expected  
241 value using the mean and standard deviation from <sup>12</sup> using the standard equation:

$$242 \quad C_{faeces} = \exp(\ln(10^\mu) + 0.5(\ln(10^\sigma))^2) \quad (3)$$

243 Where  $\mu$  is the sample mean and  $\sigma$  is the sample standard deviation of the log normal  
244 distribution. <sup>12</sup> state that  $\mu$  of the distribution is  $5.22 \log_{10}$  copies  $\text{ml}^{-1}$  and  $\sigma = 1.86 \log_{10}$   
245 copies  $\text{ml}^{-1}$  which results in an expected  $C_{faeces}$  concentration within the sewage effluent of  
246  $1595.9$  million copies  $\text{ml}^{-1}$ .  $V_{faeces}$  is the mean daily volume of faeces generated per person  
247 ( $0.149$  kg, from table 3 of <sup>26</sup> and assuming faeces has a density approximately equal to  
248 water <sup>27</sup>. Note we used the 'rich country' value from <sup>26</sup> because the RT-PCR data <sup>12</sup> that  
249 we use to estimate  $C_{faeces}$  was measured from samples collected in Germany. The  
250 prevalence data,  $P_c$ , were calculated by subtracting the number of recovered and number  
251 of fatalities from the number of confirmed cases from the Worldometer website.

252  
253 PCA does not distinguish between infectious virus and damaged/destroyed non-infectious  
254 virus. Therefore, to estimate the number of viable (infectious) virus copies, we used  
255 literature on the ratio of infectious adenovirus copies to genome copies in raw sewage (eg  
256 Rodríguez et al., 2013) wastewater discharged into rivers <sup>17</sup>. These estimates varied over  
257 four orders of magnitude, and as such we selected high ( $10^{-1}$ ), medium ( $10^{-2}$ ) and low ( $10^{-3}$ )  
258 estimates (which equate to 10%, 1% and 0.1% proportion of viable versus within the  
259 total viral genome counts).

260  
261 The expected number of copies of infectious virus resulting from a sewage spill into a river,  
262 lake or coastal region for a given country can therefore be calculated as

$$263 \quad C_{spill,c} = C_{inf,c} H_C = \frac{V_{faeces} C_{faeces} P_c}{V_{ww,c} I D F_c} \quad (4)$$

264  $C_{spill,c}$  was estimated for May 3 2020 21 countries that contain large inland water bodies  
265 and were known to rely upon reservoirs for drinking water <sup>28</sup>. Long-term statistical mean

266 water temperature, needed to calculate virus survivability, was calculated from a climate  
267 quality global lake temperature dataset (see below). Temperature values for each country  
268 were the countrywide mean lake temperature within a rectangular box matching a  
269 simplified country outline. The dilution factors reported in <sup>13</sup> can vary by several orders of  
270 magnitude and were deemed to provide the major source of uncertainty in the calculation.  
271 Therefore, the  $C_{\text{spill},c}$  viral loadings given by the 25<sup>th</sup> percentile dilution, median dilution and  
272 75<sup>th</sup> percentile dilution values are all presented. With high, medium and low estimates for  $I$ ,  
273 this results in nine estimates of  $C_{\text{spill}}$  for each country.

274

275 The long-term statistical mean global lake water temperature climatology was constructed  
276 using the  $0.05^\circ \times 0.05^\circ$  daily resolution GloboLakes v4 data set <sup>29</sup> which covers 1996 to  
277 2016. Mean temperature was calculated for each calendar month across all years  
278 producing 12 monthly mean datasets with a  $0.05^\circ \times 0.05^\circ$  gridded resolution. Uncertainty  
279 terms were propagated by assuming random errors were independent and normally  
280 distributed, and using standard error propagation methods. The resulting uncertainty term  
281 combines the original uncertainty in measurement and optimum interpolation with the  
282 spatial/temporal uncertainty of the resampled monthly average, for each grid cell.

283

284 The concentration of SARS-CoV-2 virus needed for infection is not known. <sup>30</sup> provides  $10^3$   
285 copies for influenza. The Infectious dose for SARS-CoV-2 is likely significantly lower  
286 because <sup>31</sup> ranks influenza as "very high infective dose" and SARS-CoV-2 as "low". We  
287 therefore use a value of 100 copies as a concentration that could result in infection.

288

289 A combined uncertainty budget for equation 4 was calculated using standard uncertainty  
290 propagating methods and estimates of the uncertainties of each input dataset. Uncertainty  
291 components (and their values) were domestic water usage ( $\pm 10\%$ ), population size ( $\pm 1\%$ ),

292 number of active cases ( $\pm 20\%$ ), mass of faeces generated per capita per day (0.095 kg,  
293 see table 3 of <sup>26</sup>, mean number of viral genome copies in faeces ( $3.54 \times 10^{12}$ ) and density of  
294 faeces was not included in the uncertainty analysis. This resulted in a combined  
295 uncertainty budget of  $\pm 68\%$  copies ml<sup>-1</sup>. It is important to note that this value does not  
296 include uncertainty in the dilution factors or the ratio of viral genome copies to infectious  
297 virus. Instead, the  $C_{inf}$  calculation was repeated for high, medium and low values of these  
298 parameters.

299

### 300 **Temperature dependent survival**

301 As reported in <sup>3</sup>, the virus concentration in water follows an exponential decay, with its  
302 half-life decreasing with decreasing temperature and the pH control of half life is very small  
303 over the pH range of 3-10 (which encompasses the range found in natural freshwater and  
304 marine systems). Based on the in vitro data presented in <sup>3</sup>, the following empirical model  
305 was derived to describe virus concentration reduction factor due to the temperature-  
306 dependent die-off:

$$307 \quad r = 10^{0.05T[^\circ C] - 1.32} \quad (5)$$

$$308 \quad n(t) = C_0 10^{-rt} \quad (6)$$

309 Where  $C_0$  is initial virus concentration (copies ml<sup>-1</sup>),  $n(t)$  is virus concentration after time  $t$   
310 (days) and  $r$  is 24 hour survival factor due to temperature  $T$  driven die off. This model fit to  
311 the in vitro data gives a root mean square difference (RMSD) of  $\pm 1\%$  for water at 4°C  
312 which increases to  $\pm 7.5\%$  at 22°C. When considering temperature controlled survival in  
313 the waste water system,  $C_{ww,c}$  becomes the value used for the initial viral load  $C_0$  following  
314 a sewage effluent spill. As noted in <sup>5,12</sup>, the viral load follows a heavy-tailed distribution  
315 with the majority of patients shedding around  $10^5$  copies ml<sup>-1</sup>) but some having viral loads  
316 as high as  $10^{12}$  copies ml<sup>-1</sup>. This results in the super-spreader problem where a tiny  
317 proportion of the infected population can become responsible for contributing a majority of

318 viral load in the wastewater. For a large infected population, this approach allows robust  
319 statistical modeling of viral load. However, in case of smaller communities with low number  
320 of infections, the actual viral load could be severely underestimated if a super-spreader is  
321 present within the population.

322

### 323 **Whale filtering calculation**

324 The example volume flow rate through the mouth of a medium sized Bowhead whale  
325 whilst feeding was provided by <sup>32)</sup> A flow rate of  $5.65 \text{ m}^3 \text{ s}^{-1}$  is given for a 15 m whale  
326 (mouth pressure of  $-1768 \text{ Pa}$  at a  $4 \text{ km h}^{-1}$  foraging speed, assuming an oral opening of  
327  $5.09 \text{ m}^2$  with an opening radius =  $1.27 \text{ m}$ ). Assuming a low viral concentration of 1 copies  
328 per  $\text{ml}^{-1}$ , which equates to  $1000 \text{ copies l}^{-1}$ .  $5.65 \text{ m}^3 \text{ s}^{-1}$  equates to  $5650 \text{ L s}^{-1}$ . The dosage  
329 per second as the whale swims during feeding is given by  $1000 (\text{copies L}^{-1}) \times 5650 (\text{L s}^{-1})$   
330 =  $5.65 \text{ million copies s}^{-1}$ .

331

### 332 **References**

3331. Lai, C. C., Shih, T. P., Ko, W. C., Tang, H. J. & Hsueh, P. R. Severe acute  
334 respiratory syndrome coronavirus 2 (SARS-CoV-2) and coronavirus disease-2019  
335 (COVID-19): The epidemic and the challenges. *International Journal of Antimicrobial*  
336 *Agents* **55**, 105924 (2020). doi:10.1016/j.ijantimicag.2020.105924
3372. Rodino, K. G. *et al.* Evaluation of saline, phosphate buffered saline and minimum  
338 essential medium as potential alternatives to viral transport media for SARS-CoV-2  
339 testing. *Journal of clinical microbiology* (2020). doi:10.1128/JCM.00590-20
3403. Chin, A. *et al.* Stability of SARS-CoV-2 in different environmental conditions.  
341 *medRxiv* 2020.03.15.20036673 (2020). doi:10.1101/2020.03.15.20036673
3424. Xiao, F. *et al.* Infectious SARS-CoV-2 in Feces of Patient with Severe COVID-19.  
343 *Emerg. Infect. Dis.* **26**, (2020). doi:10.3201/eid2608.200681
3445. Wölfel, R. *et al.* Virological assessment of hospitalized patients with COVID-2019.  
345 *Nature* **581**, 465–469 (2020). doi:10.1038/s41586-020-2196-x
3466. Lavezzo, E. *et al.* Suppression of COVID-19 outbreak in the municipality of Vo, Italy.  
347 *medRxiv* 2020.04.17.20053157 (2020). doi:10.1101/2020.04.17.20053157



3487. La Rosa, G. *et al.* First detection of SARS-CoV-2 in untreated wastewaters in Italy.  
349 *Sci. Total Environ.* **736**, 139652 (2020). doi:10.1016/j.scitotenv.2020.139652
3508. Ahmed, W. *et al.* First confirmed detection of SARS-CoV-2 in untreated wastewater  
351 in Australia: A proof of concept for the wastewater surveillance of COVID-19 in the  
352 community. *Sci. Total Environ.* **728**, 138764 (2020).  
353 doi:10.1016/j.scitotenv.2020.138764
3549. Gundy, P. M., Gerba, C. P. & Pepper, I. L. Survival of Coronaviruses in Water and  
355 Wastewater. *Food Environ. Virol.* **1**, 10–14 (2009). doi:10.1007/s12560-008-9001-6
35610. Amirian, E. S. Potential fecal transmission of SARS-CoV-2: Current evidence and  
357 implications for public health. *Int. J. Infect. Dis.* **95**, 363–370 (2020).  
358 doi:10.1016/j.ijid.2020.04.057
35911. Olds, H. T. *et al.* High levels of sewage contamination released from urban areas  
360 after storm events: A quantitative survey with sewage specific bacterial indicators.  
361 *PLOS Med.* **15**, e1002614 (2018). doi:10.1371/journal.pmed.1002614
36212. Jones, T. C. *et al.* *An analysis of SARS-CoV-2 viral load by patient age.* Report,  
363 (2020).
36413. Keller, V. D. J., Williams, R. J., Lofthouse, C. & Johnson, A. C. Worldwide estimation  
365 of river concentrations of any chemical originating from sewage-treatment plants  
366 using dilution factors. *Environ. Toxicol. Chem.* **33**, 447–452 (2014).  
367 doi:10.1002/etc.2441
36814. McBride, G. B., Stott, R., Miller, W., Bambic, D. & Wuertz, S. Discharge-based  
369 QMRA for estimation of public health risks from exposure to stormwater-borne  
370 pathogens in recreational waters in the United States. *Water Res.* **47**, 5282–5297  
371 (2013). doi:10.1016/j.watres.2013.06.001
37215. La Rosa, G., Bonadonna, L., Lucentini, L., Kenmoe, S. & Suffredini, E. Coronavirus  
373 in water environments: Occurrence, persistence and concentration methods - A  
374 scoping review. *Water Res.* **179**, 115899 (2020). doi:10.1016/j.watres.2020.115899
37516. Rodríguez, R. A., Polston, P. M., Wu, M. J., Wu, J. & Sobsey, M. D. An improved  
376 infectivity assay combining cell culture with real-time PCR for rapid quantification of  
377 human adenoviruses 41 and semi-quantification of human adenovirus in sewage.  
378 *Water Res.* **47**, 3183–3191 (2013). doi:10.1016/j.watres.2013.03.022
37917. Sedji, M. I. *et al.* Quantification of human adenovirus and norovirus in river water in  
380 the north-east of France. *Environ. Sci. Pollut. Res.* **25**, 30497–30507 (2018).  
381 doi:10.1007/s11356-018-3045-4
38218. Zaneti, R. N. *et al.* QMRA of SARS-CoV-2 for workers in wastewater treatment  
383 plants. *medRxiv* 2020.05.28.20116277 (2020). doi:10.1101/2020.05.28.20116277
38419. Wurtzer, S. *et al.* Evaluation of lockdown impact on SARS-CoV-2 dynamics through  
385 viral genome quantification in Paris wastewaters. *medRxiv* 2020.04.12.20062679  
386 (2020). doi:10.1101/2020.04.12.20062679

38720. Damas, J. *et al.* Broad Host Range of SARS-CoV-2 Predicted by Comparative and  
388 Structural Analysis of ACE2 in Vertebrates. *bioRxiv* 2020.04.16.045302 (2020).  
389 doi:10.1101/2020.04.16.045302
39021. Rusiñol, M. *et al.* Evidence of viral dissemination and seasonality in a Mediterranean  
391 river catchment: Implications for water pollution management. *J. Environ. Manage.*  
392 **159**, 58–67 (2015). doi:10.1016/j.jenvman.2015.05.019
39322. WHO. *Water, sanitation, hygiene, and waste water management for the COVID-19*  
394 *virus: interim guidance*. (2020).
39523. Derraik, J. G. B., Anderson, W. A., Connelly, E. A. & Anderson, Y. C. Rapid  
396 evidence summary on SARS-CoV-2 survivorship and disinfection, and a reusable  
397 PPE protocol using a double-hit process. *medRxiv* (2020).  
398 doi:10.1101/2020.04.02.20051409
39924. Wang, X.-W. *et al.* Study on the resistance of severe acute respiratory syndrome-  
400 associated coronavirus. *J. Virol. Methods* **126**, 171–177 (2005).  
401 doi:10.1016/j.jviromet.2005.02.005
40225. Huyvaert, K. P. *et al.* Freshwater Clams As Bioconcentrators of Avian Influenza  
403 Virus in Water. *Vector-Borne Zoonotic Dis.* **12**, 904–906 (2012).  
404 doi:10.1089/vbz.2012.0993
40526. Rose, C., Parker, A., Jefferson, B. & Cartmell, E. The Characterization of Feces and  
406 Urine: A Review of the Literature to Inform Advanced Treatment Technology. *Crit.*  
407 *Rev. Environ. Sci. Technol.* **45**, 1827–1879 (2015).  
408 doi:10.1080/10643389.2014.1000761
40927. Penn, R., Ward, B. J., Strande, L. & Maurer, M. Review of synthetic human faeces  
410 and faecal sludge for sanitation and wastewater research. *Water Res.* **132**, 222–240  
411 (2018). doi:10.1016/j.watres.2017.12.063
41228. White, W. R. *World water: resources, usage and the role of man made reservoirs,*  
413 *FR/R0012*. (2019).
41429. Carrea, L. & Merchant, C. J. GloboLakes: Lake Surface Water Temperature (LSWT)  
415 v4.0 (1995-2016). *Cent. Environ. Data Anal.* (2019).  
416 doi:10.5285/76a29c5b55204b66a40308fc2ba9cdb3
41730. Nikitin, N., Petrova, E., Trifonova, E. & Karpova, O. Influenza Virus Aerosols in the  
418 Air and Their Infectiousness. *Adv. Virol.* (2014). doi:10.1155/2014/859090
41931. Lee, P.-I. & Hsueh, P.-R. Emerging threats from zoonotic coronaviruses—from SARS  
420 and MERS to 2019-nCoV. *J. Microbiol. Immunol. Infect.* **53**, 365–367 (2020).  
421 doi:10.1016/j.jmii.2020.02.001
42232. Werth, A. J. Models of hydrodynamic flow in the bowhead whale filter feeding  
423 apparatus. *J. Exp. Biol.* **207**, 3569–3580 (2004). doi:10.1242/jeb.01202  
424
